# Supplementary material
Source: PubMed Central journal article supplement (PMC3366583)
Supplement: NIHMS367250-supplement-1_si_001.pdf [file NIHMS367250-supplement-1_si_001.pdf]

## Supporting Information

# The Discovery of a Potent Small-Molecule Antagonist of cIAP1/2 and XIAP Proteins and Clinical Candidate for the Treatment of Cancer (GDC-0152)

*John A. Flygare,<sup>\*,†</sup> Maureen Beresini,<sup>‡</sup> Nageshwar Budha,<sup>#</sup> Helen Chan,<sup>|</sup> Iris T. Chan,<sup>⊥</sup> Sravanthi Cheeti,<sup>#</sup> Frederick Cohen,<sup>†</sup> Kurt Deshayes,<sup>§</sup> Karl Doerner,<sup>¶</sup> S. Gail Eckhardt,<sup>⋆</sup> Linda O. Elliott,<sup>‡</sup> Bainian Feng,<sup>†</sup> Matthew C. Franklin,<sup>§</sup> Stacy Frankovitz Reisner,<sup>‡</sup> Lewis Gazzard,<sup>†</sup> Jason Halladay,<sup>|</sup> Sarah G. Hymowitz,<sup>◇</sup> Hank La,<sup>|</sup> Patricia LoRusso,<sup>∇</sup> Brigitte Maurer,<sup>◇</sup> Lesley Murray,<sup>¶</sup> Emile Plise,<sup>|</sup> Clifford Quan,<sup>§</sup> Jean-Philippe Stephan,<sup>‡</sup> Young G. Shin,<sup>|</sup> Jeffrey Tom,<sup>§</sup> Vickie Tsui,<sup>†</sup> Joanne Um,<sup>†</sup> Eugene Varfolomeev,<sup>§</sup> Domagoj Vucic,<sup>§</sup> Andrew J. Wagner,<sup>∞</sup> Heidi J.A. Wallweber,<sup>◇</sup> Lan Wang,<sup>†</sup> Joseph Ware,<sup>#</sup> Zhaoyang Wen,<sup>†</sup> Harvey Wong,<sup>|</sup> Jonathan M. Wong,<sup>†</sup> Melisa Wong,<sup>†</sup> Susan Wong,<sup>|</sup> Ron Yu,<sup>▽</sup> Kerry Zobel,<sup>§</sup> and Wayne J. Fairbrother<sup>\*,§</sup>*

### Table of Contents

X-ray data collection and refinement statistics (Table S1) – 2

Summary of clinical pharmacokinetics parameters for **1** from Day 1 Cycle 1 (Table S2) – 3

Immunoprecipitation and immunoblotting of melanoma SK-MEL28 cells (Figure S1) – 4

**Table S1.** X-ray data collection and refinement statistics

| Protein Construct               | ML-IAP/XIAP chimera              | cIAP1/XIAP chimera                            |
|---------------------------------|----------------------------------|-----------------------------------------------|
|                                 | (MLXBIR3SG)                      | (cXBIR3CS)                                    |
| Resolution (Å)                  | 50 – 1.71<br>(1.75 – 1.71)       | 31.36 – 1.79<br>(1.83 – 1.79)                 |
| Space Group                     | P4 <sub>1</sub> 2 <sub>1</sub> 2 | P2 <sub>1</sub> 2 <sub>1</sub> 2 <sub>1</sub> |
| Unit cell (Å)                   | a = 87.4, c = 73.5               | a = 35.7, b = 37.4, c = 57.6                  |
| Unique reflections              | 29,746 (2,145)                   | 6,767 (369)                                   |
| R <sub>sym</sub> <sup>b</sup>   | 0.055 (0.346)                    | 0.085 (0.467)                                 |
| <I/σ(I)>                        | 32.9 (5.7)                       | 13 (2.5)                                      |
| Redundancy                      | 7.9 (8.0)                        | 3.3 (3.3)                                     |
| R <sub>cryst</sub> <sup>c</sup> | 0.154                            | 0.177                                         |
| R <sub>free</sub> <sup>d</sup>  | 0.162                            | 0.230                                         |
| Bond RMSD (Å)                   | 0.007                            | 0.011                                         |
| Angle RMSD (°)                  | 1.1                              | 1.5                                           |

<sup>a</sup> Numbers in parentheses are for the highest resolution shell. <sup>b</sup>  $R_{\text{sym}} = \frac{\sum_{hkl} |I - \langle I \rangle|}{\sum_{hkl} I}$ .

<sup>c</sup>  $R_{\text{cryst}} = \frac{\sum_{hkl} \|F_{(\text{obs})} - F_{(\text{calc})}\|}{\sum_{hkl} |F_{(\text{obs})}|}$ . <sup>d</sup>  $R_{\text{free}} = R_{\text{cryst}}$  for a random 5% (MLXBIR3SG) or 10% (cXBIR3CS) of reflections.

**Table S2.** Summary of clinical pharmacokinetics parameters for Compound **1** from Day 1 of

Cycle 1

| Cohort | Dose<br>(mg/kg) |      | Terminal<br>Half-Life<br>(hr) | C <sub>max</sub><br>(μM) | AUC <sub>∞</sub><br>(μM·hr) | CL<br>(mL/min/kg) | V <sub>ss</sub><br>(L/kg) |
|--------|-----------------|------|-------------------------------|--------------------------|-----------------------------|-------------------|---------------------------|
| 1      | 0.049           | N    | 2                             | 2                        | 2                           | 2                 | 2                         |
|        |                 | Mean | 3.8                           | 0.18                     | 0.13                        | 20                | 1.0                       |
|        |                 | CV%  | 40                            | 6.5                      | 10                          | 21                | 12                        |
| 2      | 0.1             | N    | 3                             | 3                        | 3                           | 3                 | 3                         |
|        |                 | Mean | 4.4                           | 0.55                     | 0.36                        | 10.8              | 0.6                       |
|        |                 | CV%  | 28                            | 67                       | 44                          | 40                | 62                        |
| 3      | 0.2             | N    | 4                             | 4                        | 4                           | 4                 | 4                         |
|        |                 | Mean | 4.2                           | 1.1                      | 0.84                        | 10.7              | 0.7                       |
|        |                 | CV%  | 11                            | 24                       | 25                          | 35                | 51                        |
| 4      | 0.28            | N    | 3                             | 3                        | 3                           | 3                 | 3                         |
|        |                 | Mean | 3.4                           | 1.4                      | 1.2                         | 12.0              | 0.6                       |
|        |                 | CV%  | 15                            | 35                       | 28                          | 17                | 22                        |
| 5      | 0.39            | N    | 5                             | 5                        | 5                           | 5                 | 5                         |
|        |                 | Mean | 4.0                           | 1.6                      | 1.4                         | 12.2              | 0.8                       |
|        |                 | CV%  | 12                            | 33                       | 37                          | 36                | 34                        |
| 6      | 0.54            | N    | 4                             | 4                        | 4                           | 4                 | 4                         |
|        |                 | Mean | 3.9                           | 3.6                      | 2.7                         | 10.3              | 0.6                       |
|        |                 | CV%  | 7                             | 101                      | 65                          | 55                | 72                        |
| 7      | 0.76            | N    | 11                            | 11                       | 11                          | 11                | 11                        |
|        |                 | Mean | 4.1                           | 3.3                      | 2.8                         | 11.6              | 0.7                       |
|        |                 | CV%  | 10                            | 27                       | 23                          | 22                | 40                        |
| 8      | 1.06            | N    | 3                             | 3                        | 3                           | 3                 | 3                         |
|        |                 | Mean | 3.7                           | 6.3                      | 5.2                         | 10.2              | 0.7                       |
|        |                 | CV%  | 10                            | 67                       | 42                          | 42                | 47                        |
| 9      | 1.48            | N    | 1                             | 1                        | 1                           | 1                 | 1                         |
|        |                 | Mean | 3.9                           | 7.0                      | 6.8                         | 11.3              | 0.8                       |
|        |                 | CV%  | na                            | na                       | na                          | na                | na                        |

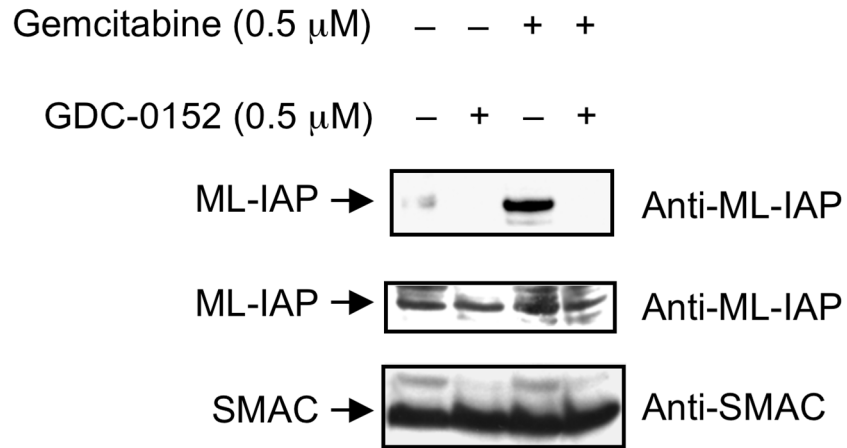

**Figure S1.** SK-MEL28 cells were treated with Gemcitabine (0.5  $\mu$ M) and compound **1** (0.5  $\mu$ M) for 20 h in the presence of the caspase inhibitor, zVAD (10  $\mu$ M). At that time the cells were lysed in NP40 lysis buffer, immunoprecipitated with the anti-Smac antibody, resolved on SDS-PAGE, and immunoprecipitates (top panel) and total cell lysates (bottom two panels) were immuno-blotted with anti-ML-IAP and anti-Smac antibodies.
